# Supplementary material for: Fabricating a high-performance anode by coating a carbon layer on a yolk–shell bimetallic selenide microsphere for enhanced lithium storage
Source: Royal Society of Chemistry journal article supplement (doi:10.1039/d4dt01462f), 2024-01-01
Supplement: d4dt01462f1.pdf [file d4dt01462f1.pdf]

## Supporting Information

### **Engineering carbon layer on yolk-shell bimetallic selenide microsphere boosts lithium storage as a high-performance anode**

Wenzhe Wang<sup>a</sup>, Shuting Qiu<sup>a</sup>, Tianqi Gao<sup>a</sup>, Hua He<sup>a</sup>, Xiaojun Zhao<sup>b,\*</sup>, Zhi-Hong Liu<sup>a,\*</sup>

<sup>a</sup>Key Laboratory for Macromolecular Science of Shaanxi Province, School of Chemistry and Chemical Engineering, Shaanxi Normal University, Xi'an 710062, P. R. China (liuzh@snnu.edu.cn).

<sup>b</sup>School of Metallurgical Engineering, Xi'an University of Architecture and Technology, Xi'an 710055, P. R. China (x.j.zhao@hotmail.com; xjzhao@xauat.edu.cn).

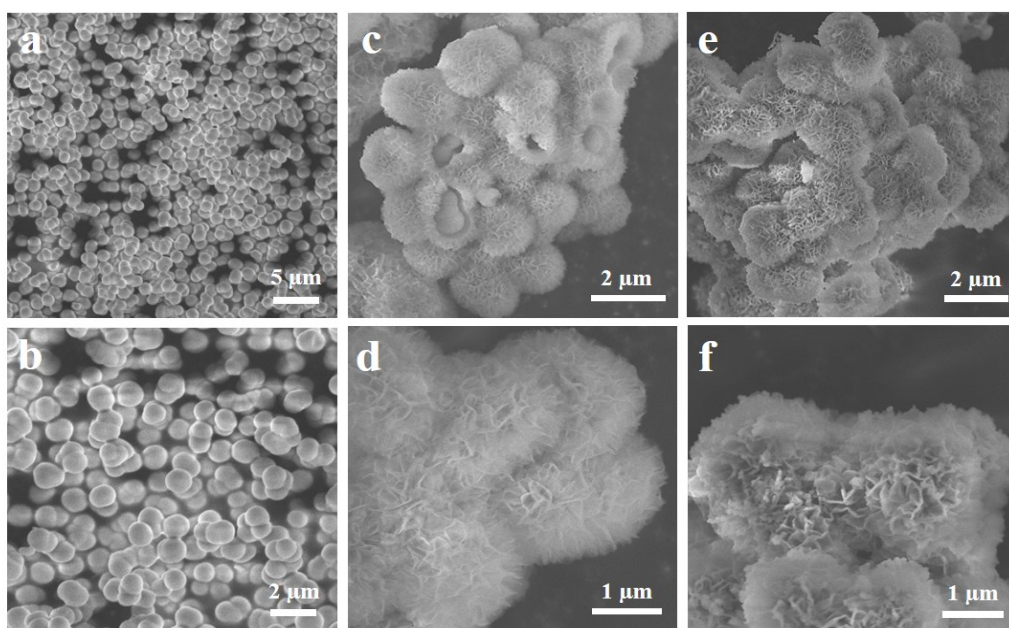

**Fig. S1** SEM images of (a, b) CoNi-glycerate, (c, d) CoNi-OH and (e, f) CoNi-OH@PDA.

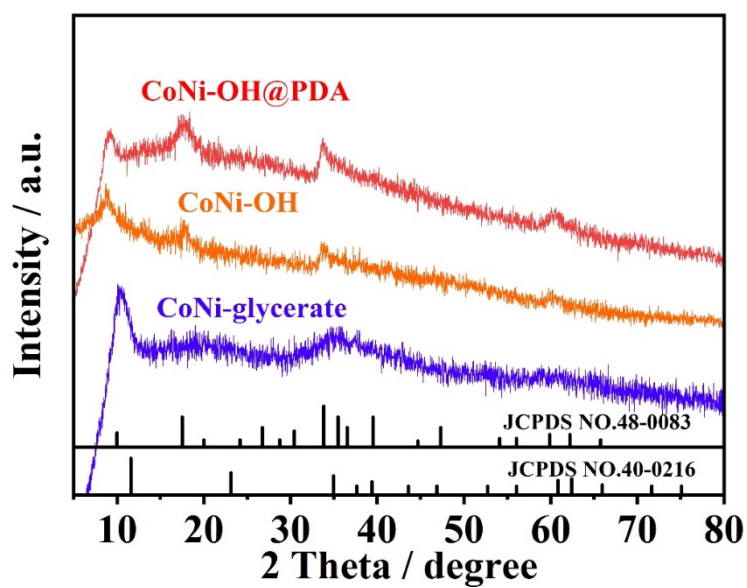

**Fig. S2** XRD patterns of CoNi-glycerate, CoNi-OH and CoNi-OH@PDA yolk shell structure.

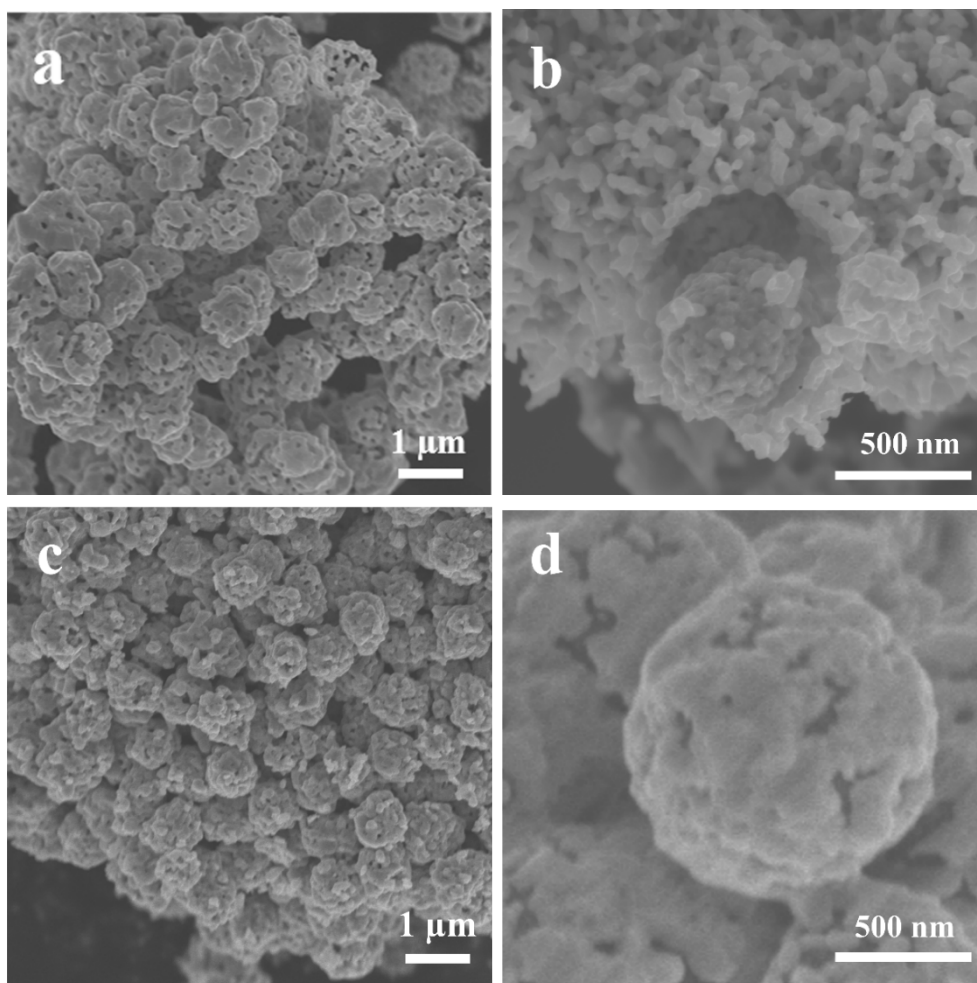

**Fig. S3** SEM images of (a, b)  $\text{CoSe}_2/\text{Ni}_3\text{Se}_4$  and (c, d)  $s\text{-CoSe}_2/\text{Ni}_3\text{Se}_4$ .

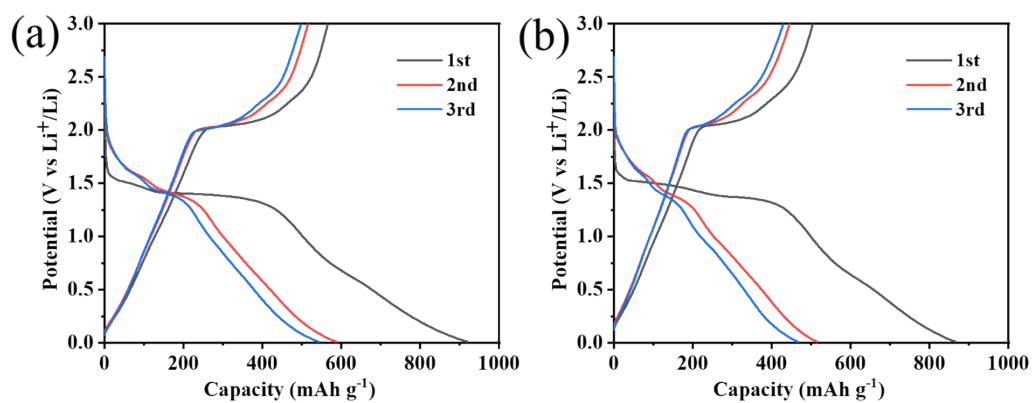

**Fig. S4** Galvanostatic charge/discharge curves of (a)  $\text{CoSe}_2/\text{Ni}_3\text{Se}_4$  and (b)  $s\text{-CoSe}_2/\text{Ni}_3\text{Se}_4$ .

**Table S1.** Comparison of electrochemical properties of Co-based and Ni-based selenides carbon materials on LIBs

| Electrode materials                                    | Cycling performance                                                                                                                    | Rate Performance<br>(mA h g <sup>-1</sup> @ A g <sup>-1</sup> ) | Ref.                                                        |
|--------------------------------------------------------|----------------------------------------------------------------------------------------------------------------------------------------|-----------------------------------------------------------------|-------------------------------------------------------------|
| NiSe <sub>2</sub> /CoSe <sub>2</sub> /Graphene         | < 245.6 mA h g <sup>-1</sup> after 500 cycles at 1 A g <sup>-1</sup>                                                                   | 544 @ 0.2<br>184 @ 2.0                                          | Colloid. Surface. A, 2024, <b>688</b> , 133685.             |
| CoSe-MS                                                | 156 mA h g <sup>-1</sup> after 100 cycles at 0.5 A g <sup>-1</sup>                                                                     | -                                                               | ACS Appl. Mater. Interfaces, 2019, <b>11</b> , 11292-11297. |
| ZnSe-CoSe@NC/MX                                        | 469 mA h g <sup>-1</sup> after 80 cycles at 0.2 A g <sup>-1</sup>                                                                      | 477 @ 0.1<br>444 @ 0.2<br>335 @ 2.0                             | Electrochim. Acta, 2024, <b>487</b> , 144148.               |
| CoSe/NC                                                | 310 mA h g <sup>-1</sup> after 500 cycles at 1 A g <sup>-1</sup>                                                                       | -                                                               | Nanoscale Res. Lett., 2019, <b>14</b> , 385.                |
| CoSe <sub>2</sub> @C                                   | -                                                                                                                                      | 521 @ 0.1<br>468 @ 0.2<br>321 @ 1.0                             | Appl. Surf. Sci., 2019, <b>483</b> , 85-90.                 |
| NiSe/rGO                                               | 378 mA h g <sup>-1</sup> after 50 cycles at 0.05 A g <sup>-1</sup>                                                                     | 364 @ 0.2<br>110 @ 3.2                                          | Materials, 2019, <b>12</b> , 3709.                          |
| NiSe/C                                                 | 428 mA h g <sup>-1</sup> after 50 cycles at 0.1 A g <sup>-1</sup>                                                                      | 384 @ 0.2<br>299 @ 0.5                                          | Electrochim. Acta, 2016, <b>208</b> , 238.                  |
| CoSe <sub>2</sub> /Ni <sub>3</sub> Se <sub>4</sub> @NC | 518 mA h g <sup>-1</sup> after 100 cycles at 0.2 A g <sup>-1</sup><br>319 mA h g <sup>-1</sup> after 500 cycles at 1 A g <sup>-1</sup> | 564 @ 0.2<br>129 @ 4.0                                          | <b>This Work</b>                                            |

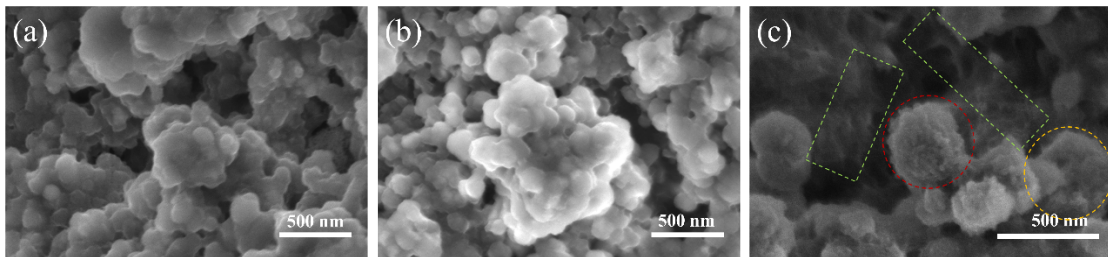

**Fig. S5** SEM images of (a) s-CoSe<sub>2</sub>/Ni<sub>3</sub>Se<sub>4</sub>, (b) CoSe<sub>2</sub>/Ni<sub>3</sub>Se<sub>4</sub> and (c) CoSe<sub>2</sub>/Ni<sub>3</sub>Se<sub>4</sub>@NC after 100 cycles at 200 mA g<sup>-1</sup>.

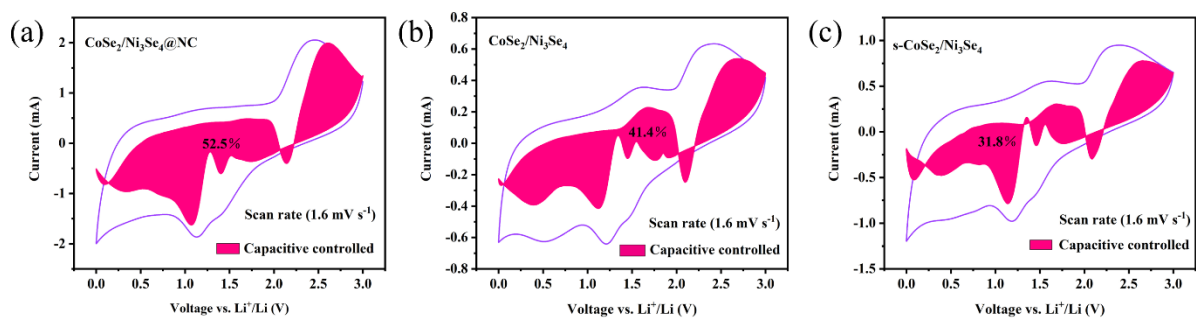

**Fig. S6** CV curve with the pseudocapacitive fraction at a scan rate of  $1.6 \text{ mV s}^{-1}$  of (a)  $\text{CoSe}_2/\text{Ni}_3\text{Se}_4@\text{NC}$ , (b)  $\text{CoSe}_2/\text{Ni}_3\text{Se}_4$  and (c)  $\text{s-CoSe}_2/\text{Ni}_3\text{Se}_4$ .

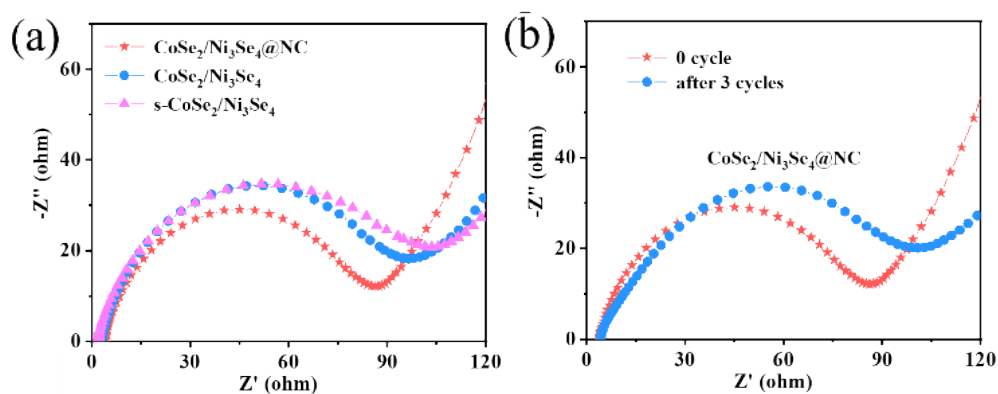

**Fig. S7** (a) The EIS plots of  $\text{CoSe}_2/\text{Ni}_3\text{Se}_4@\text{NC}$ ,  $\text{CoSe}_2/\text{Ni}_3\text{Se}_4$  and  $\text{s-CoSe}_2/\text{Ni}_3\text{Se}_4$  before cycling. (b) The EIS plots of  $\text{CoSe}_2/\text{Ni}_3\text{Se}_4@\text{NC}$  before and after 3 cycles.

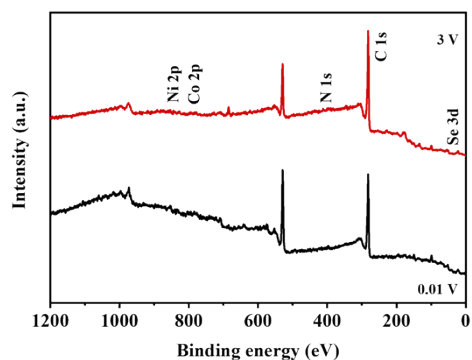

**Fig. S8** The survey spectrum of XPS spectra for  $\text{CoSe}_2/\text{Ni}_3\text{Se}_4@\text{NC}$  at different states (initial fully charge and discharge).
